# Supplementary material
Source: publisher figshare collection journal article supplement (https://acs.figshare.com/ndownloader/files/4553143)
Supplement: Supplementary file 1 [file 4553143]

## Supporting Information Available

### Figure Captions

**Figure 1.** Typical FTIR spectra for the experiments of MMA with OH radicals using 1-butene as reference hydrocarbon at different photolysis times: 0, 5 and 8 minutes.

**Figure 2.** Plot of the kinetic data for the reaction of methyl methacrylate with OH radicals obtained at 298 K using 1-butene as reference hydrocarbon.

**Figure 3.** Plot of the kinetic data for the reaction of butyl methacrylate with OH radicals obtained at 298 K using 1-butene as reference hydrocarbon.

**Figure 4.** Plot of the kinetic data for the reaction of butyl acrylate with OH radicals obtained at 298 K using isobutene ( $\square$ ) and 1-butene ( $\circ$ ) as reference hydrocarbons.

**Figure 5.** Plot of the kinetic data for the reaction of vinyl acetate with OH radicals obtained at 298 K using isobutene ( $\square$ ) and 1-butene ( $\circ$ ) as reference hydrocarbons.

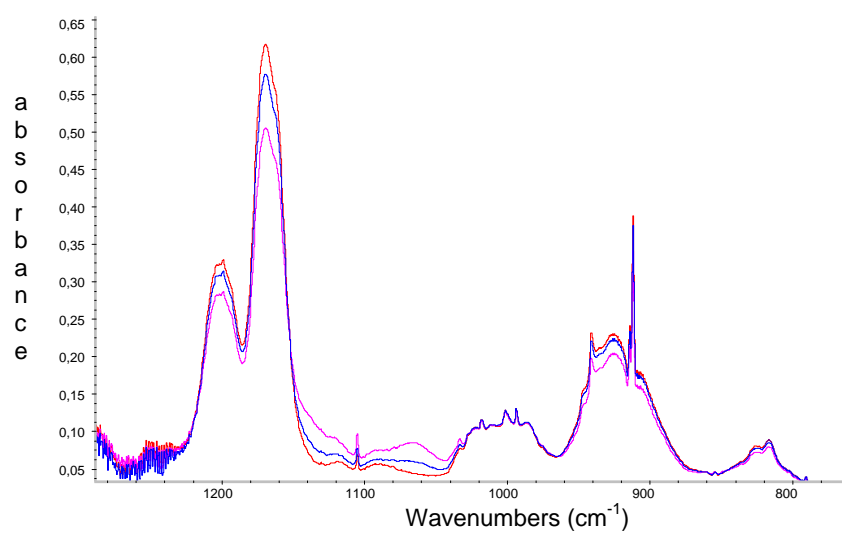

Figure 1

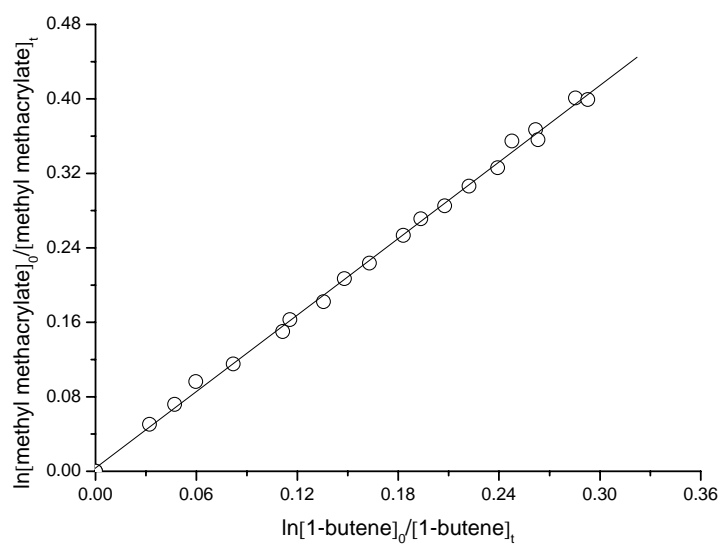

Figure 2

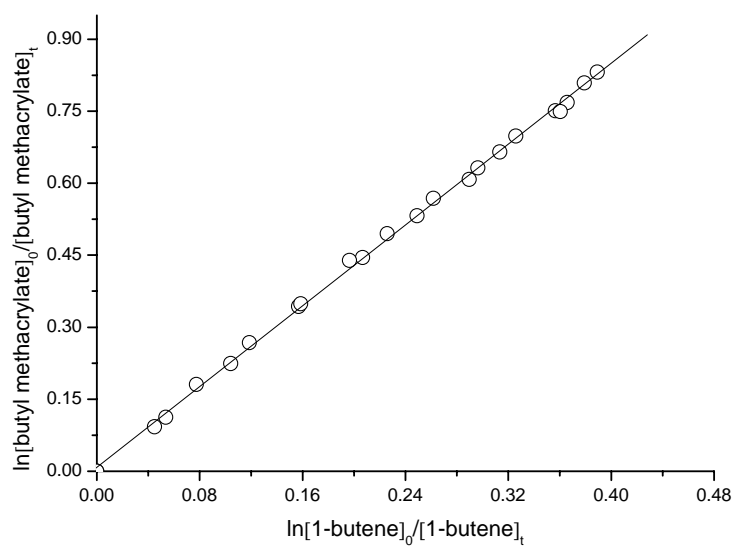

Figure 3

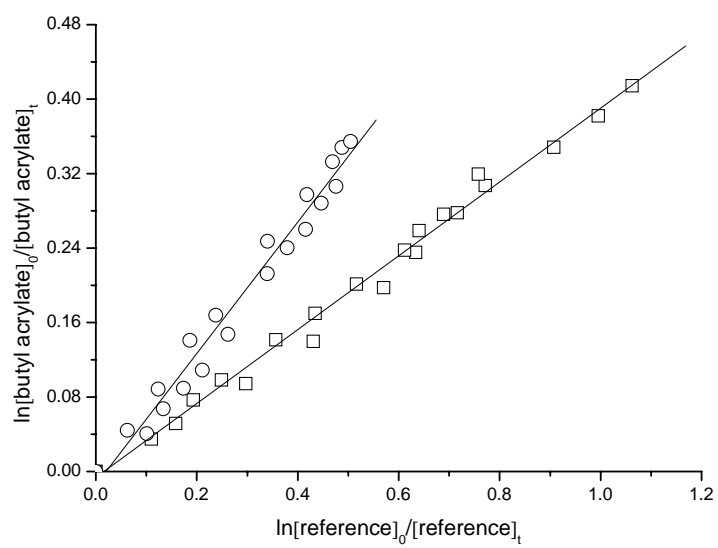

Figure 4

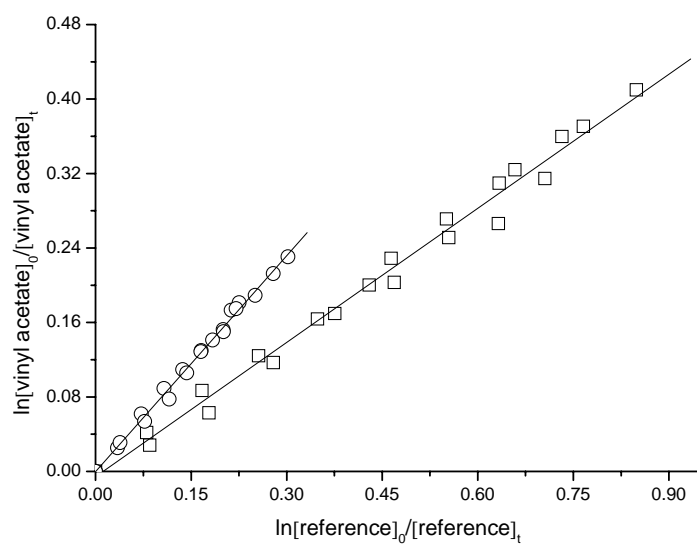

Figure 5
